# Supplementary material
Source: Springer Nature journal article supplement (https://www.springermedizin.de/resource/supplementary/13014_2012_916_MOESM2_ESM.pdf/9634384)

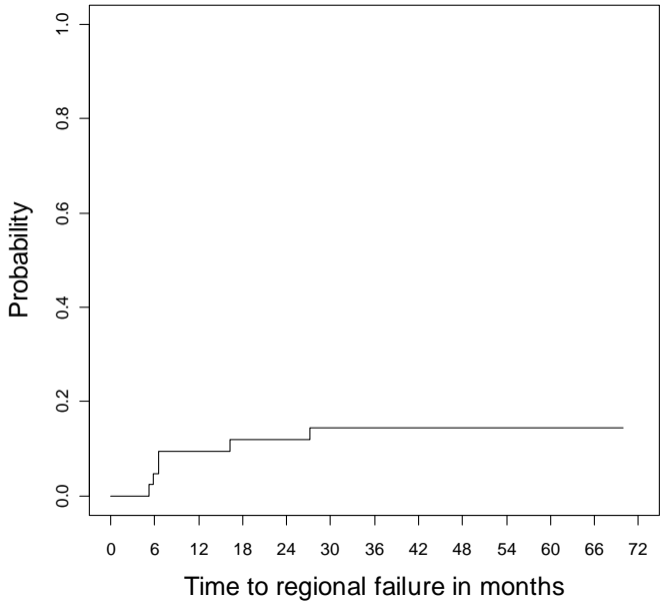

Supplement: MOESM2 [file 9634384]
